# Supplementary material for: Interactions of Boron Clusters and their Derivatives with Serum Albumin
Source: PubMed Central journal article supplement (PMC5574927; doi:10.1038/s41598-017-10314-0), 2017-08-29
Supplement: 41598_2017_10314_MOESM1_ESM.pdf [file 41598_2017_10314_MOESM1_ESM.pdf]

## **Supplementary Figures and Tables**

### **Interactions of Boron Clusters and their Derivatives with Serum Albumin**

Tomasz M. Goszczyński<sup>a\*</sup>, Krzysztof Fink<sup>a</sup>, Konrad Kowalski<sup>a</sup>, Zbigniew J. Leśnikowski<sup>b\*</sup>  
and Janusz Boratyński<sup>a</sup>

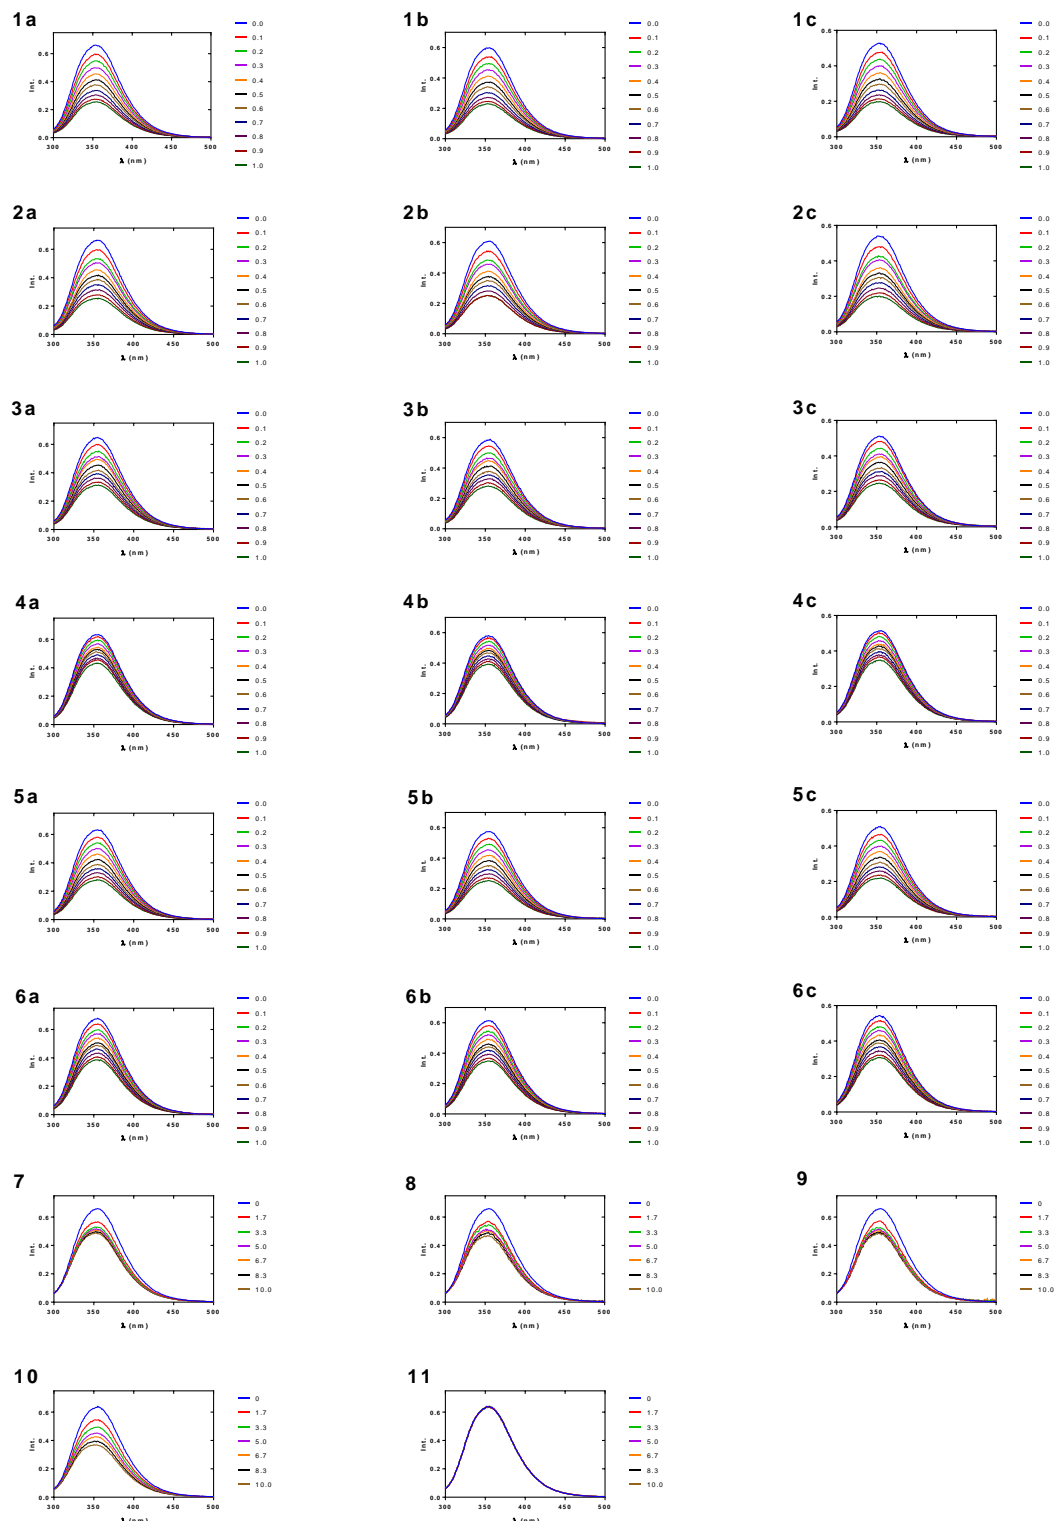

**Figure S1.** Fluorescence emission spectra of BSA (10.5  $\mu\text{M}$ ) in the presence of boron cluster and their derivatives in 0.10 M sodium bicarbonate (pH 8.4) with 2% DMSO,  $\lambda_{ex}=280$  nm. Numbers **1** to **11** are symbols of the boron compounds, whereas letters **a**, **b** and **c** show the temperature at which the measurement was performed (25, 31 and 37°C, respectively). Measurements for compounds **7** to **11** were performed only at 25°C. The concentration of **1** to **6** was 0 to 10.5  $\mu\text{M}$  with 1.05  $\mu\text{M}$  intervals; the concentration of **7** to **11** was 0 to 105  $\mu\text{M}$  with 17.5  $\mu\text{M}$  intervals. Detailed molar excess of boron cluster is described in the legend.

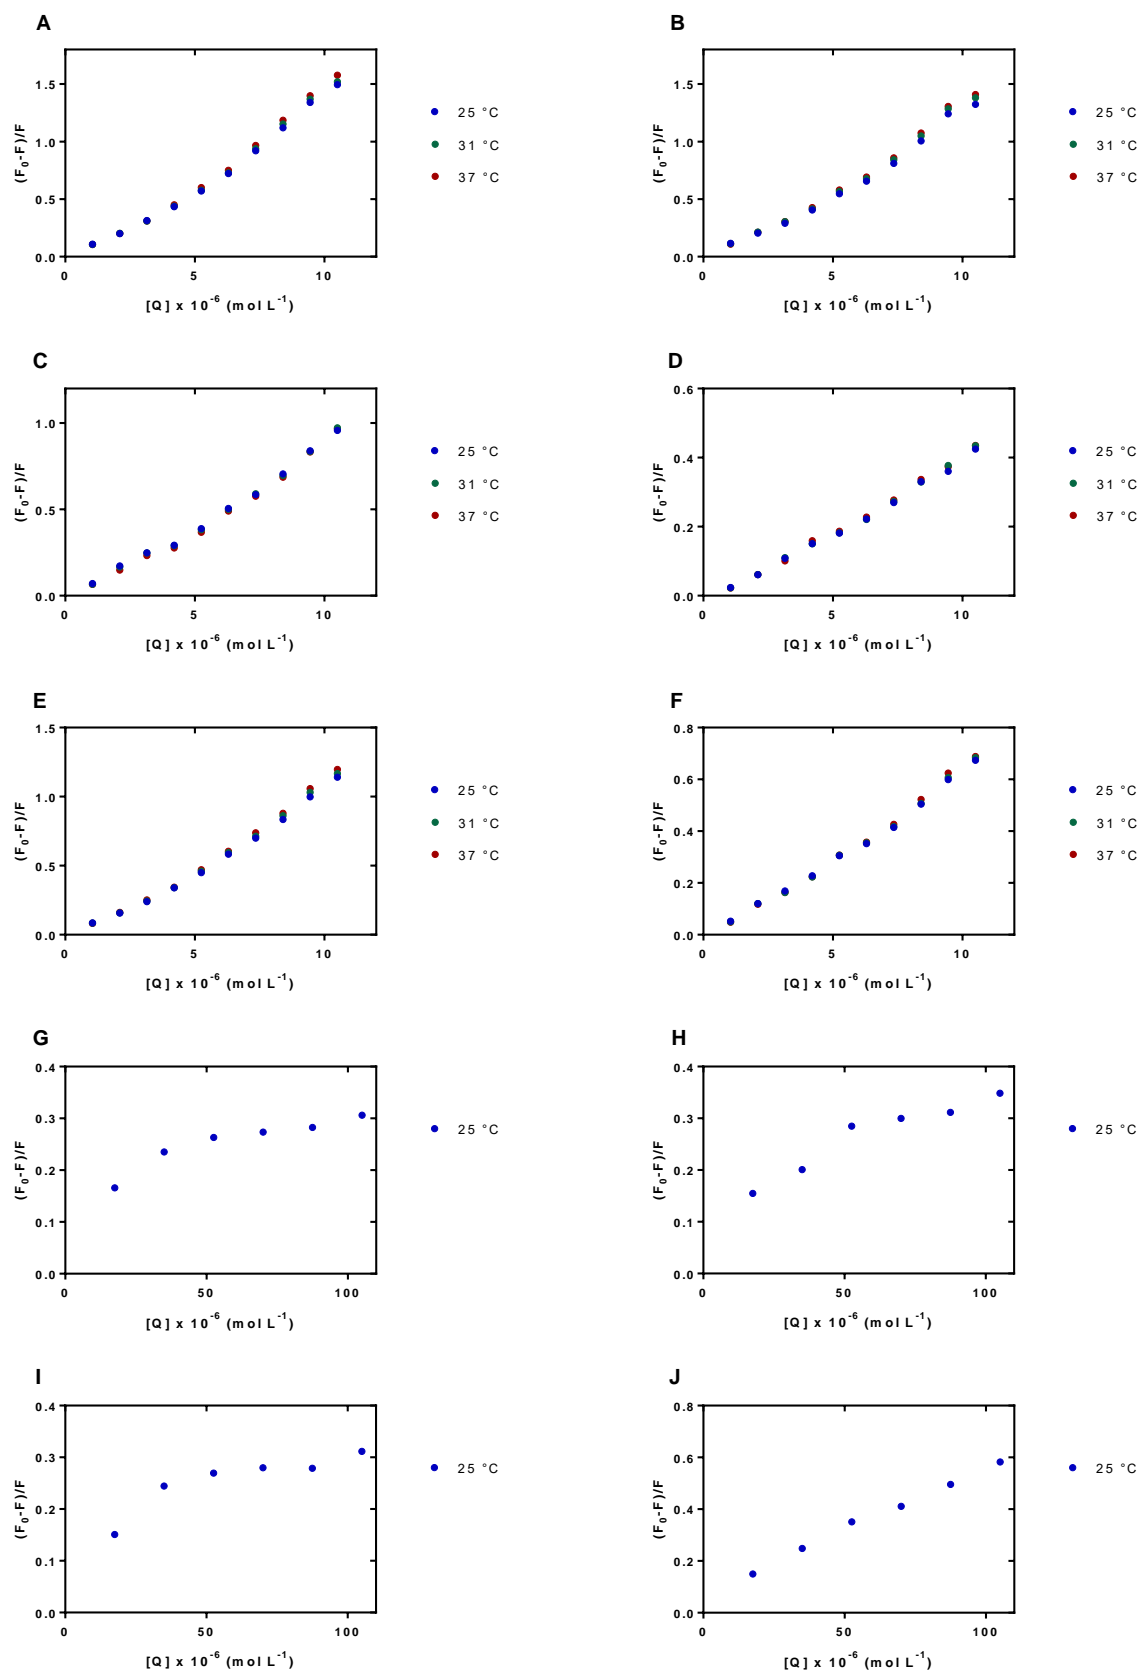

**Figure S2.** Stern-Volmer plots for the binding of BSA with compounds **1** (A), **2** (B), **3** (C), **4** (D), **5** (E), **6** (F), **7** (G), **8** (H), **9** (I) and **10** (J) at various temperatures (25, 31 and 37°C).

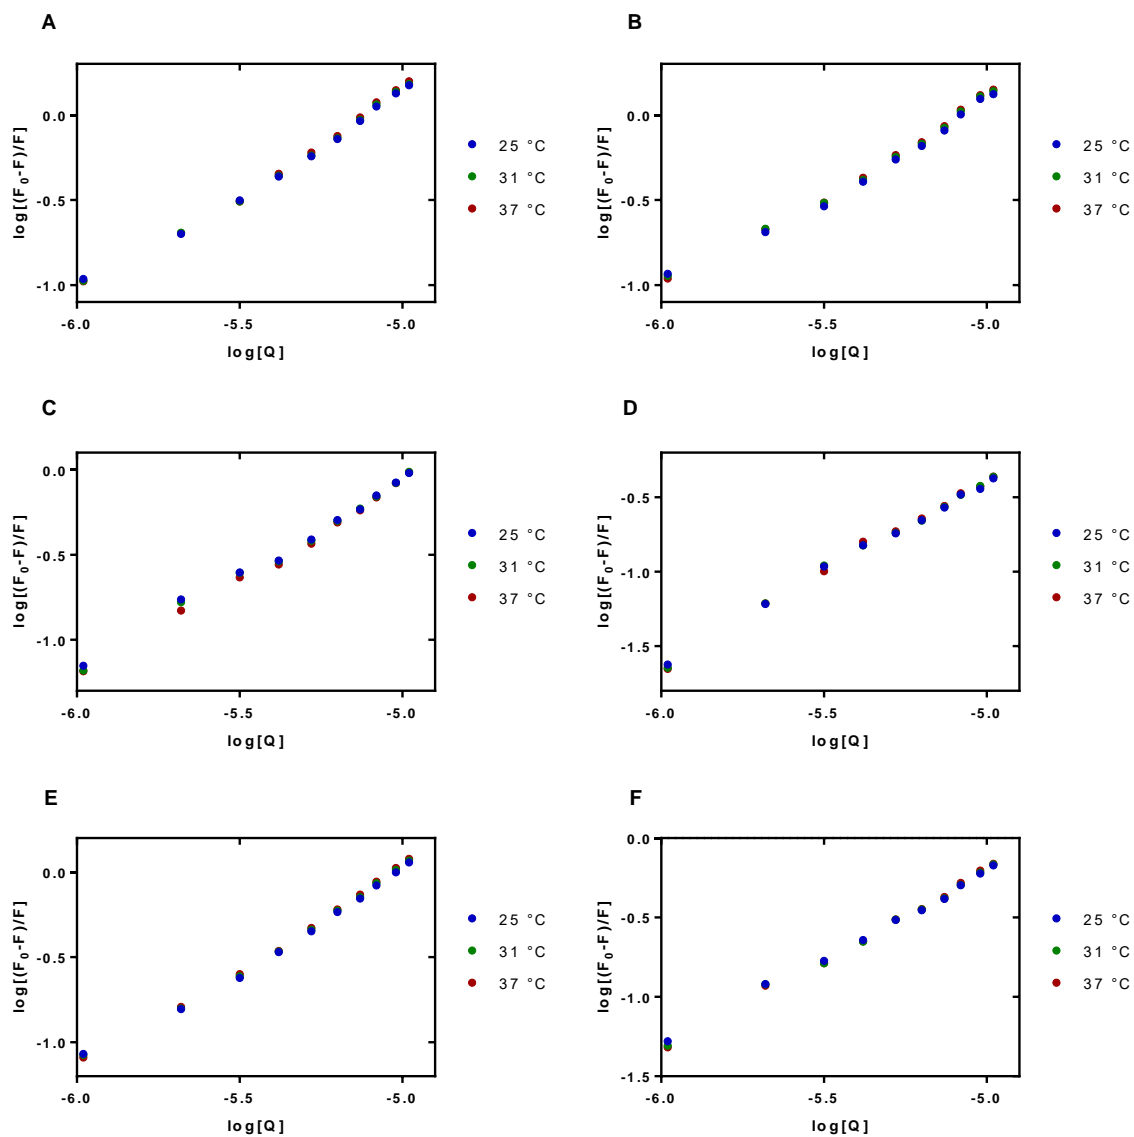

**Figure S3.** Double-logarithmic plots for the binding of BSA with compounds **1** (A), **2** (B), **3** (C), **4** (D), **5** (E) and **6** (F) at various temperatures (25, 31 and 37°C).

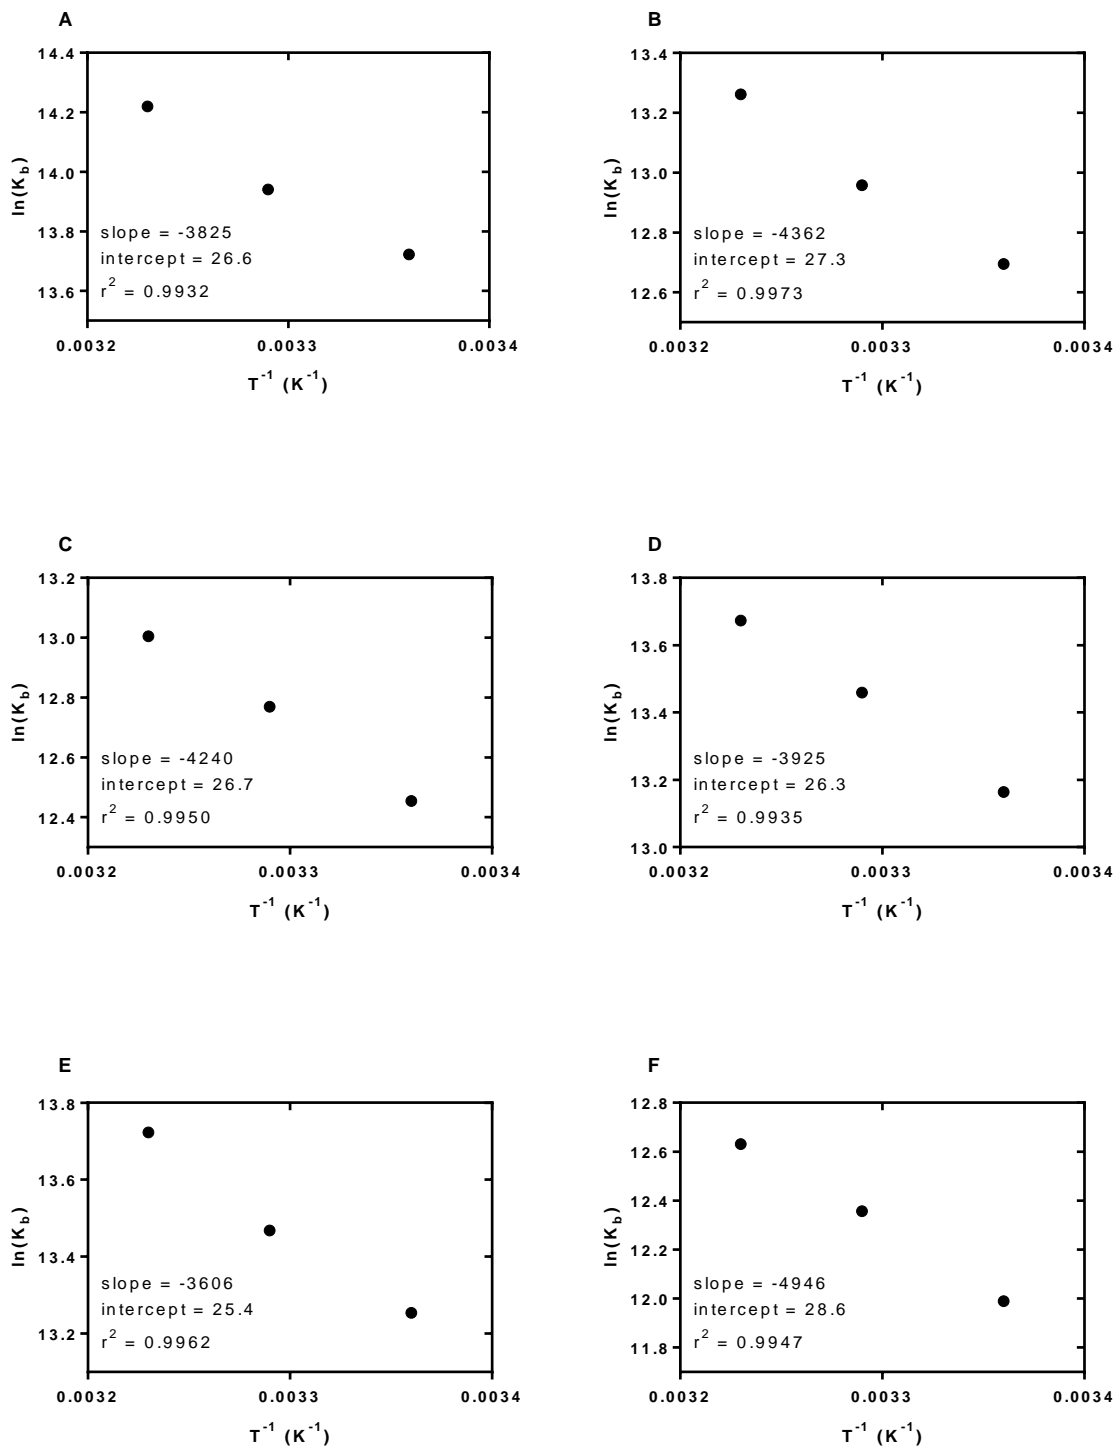

**Figure S4.** Van't Hoff plots for the binding of BSA with compounds **1** (A), **2** (B), **3** (C), **4** (D), **5** (E) and **6** (F).

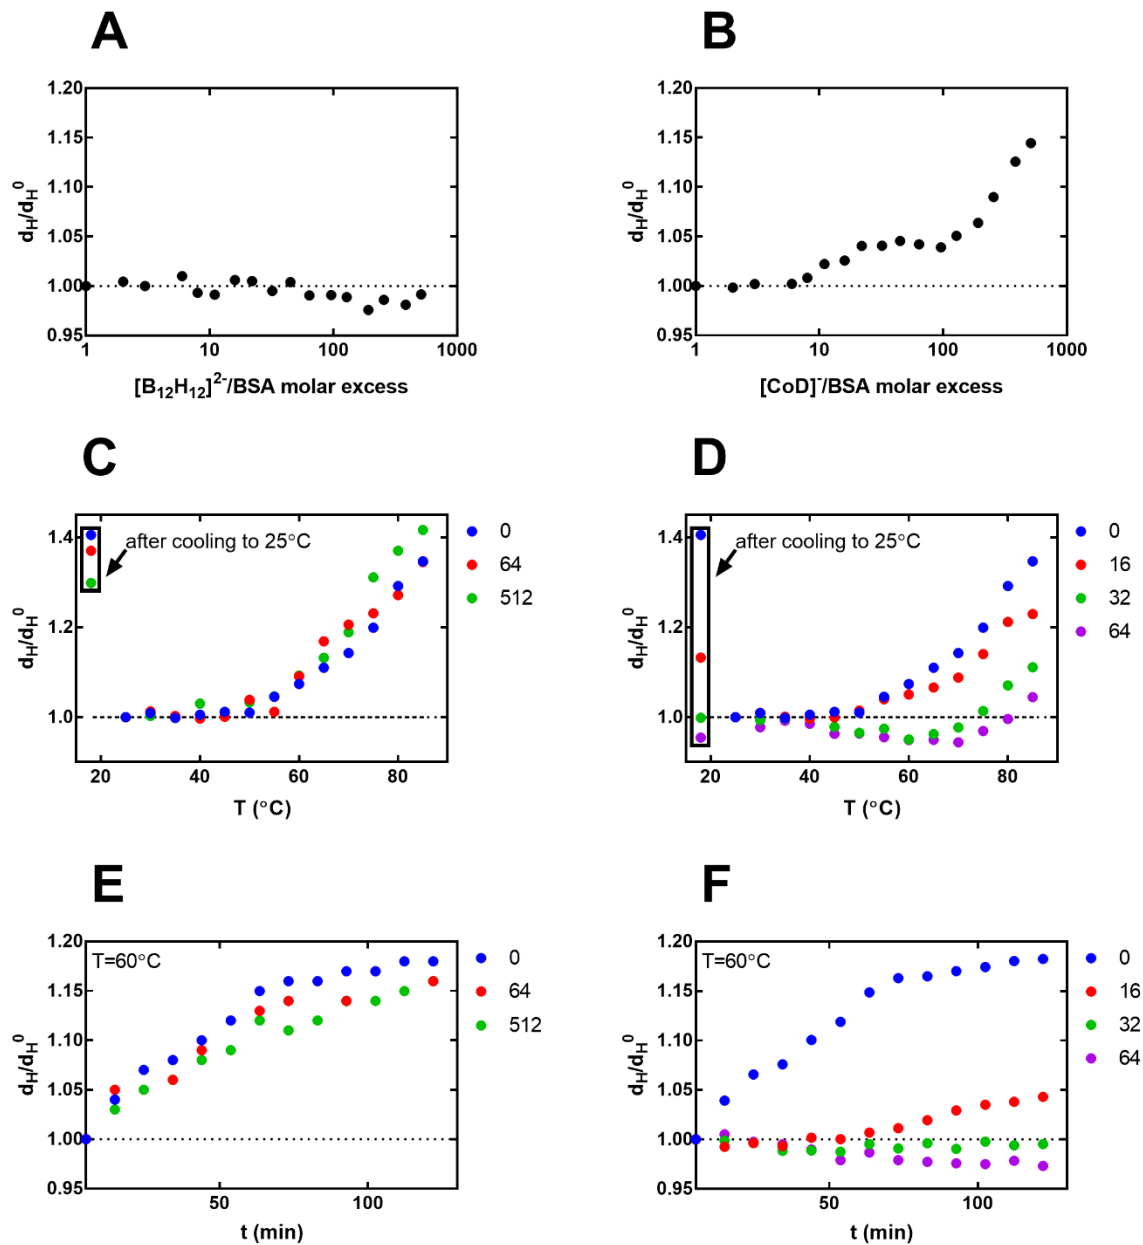

**Figure S5.** Relative hydrodynamic diameter of BSA determined by the DLS method: as a function of concentration of  $[B_{12}H_{12}]^{2-}$  (A) and  $[CoD]^-$  (B), where  $d_H^0$  is the hydrodynamic diameter of BSA without boron clusters addition, boron clusters concentration were in the range 0-7.7mM; as a function of temperature with specified in the legend  $[B_{12}H_{12}]^{2-}/BSA$  (C) and  $[CoD]^-/BSA$  (D) molar ratio where  $d_H^0$  is the hydrodynamic diameter of BSA with or without boron cluster in 25°C; as a function of time (kinetics of thermal denaturation of BSA) at 60°C with specified in the legend  $[B_{12}H_{12}]^{2-}/BSA$  (E) and  $[CoD]^-/BSA$  (F) molar ratio, where  $d_H^0$  is the initial value of hydrodynamic diameter of BSA with or without boron cluster (after 5min incubation at 60°C). All measurement were made in  $NaHCO_3$  (0.1M) with constant concentration of BSA (15 $\mu$ M).

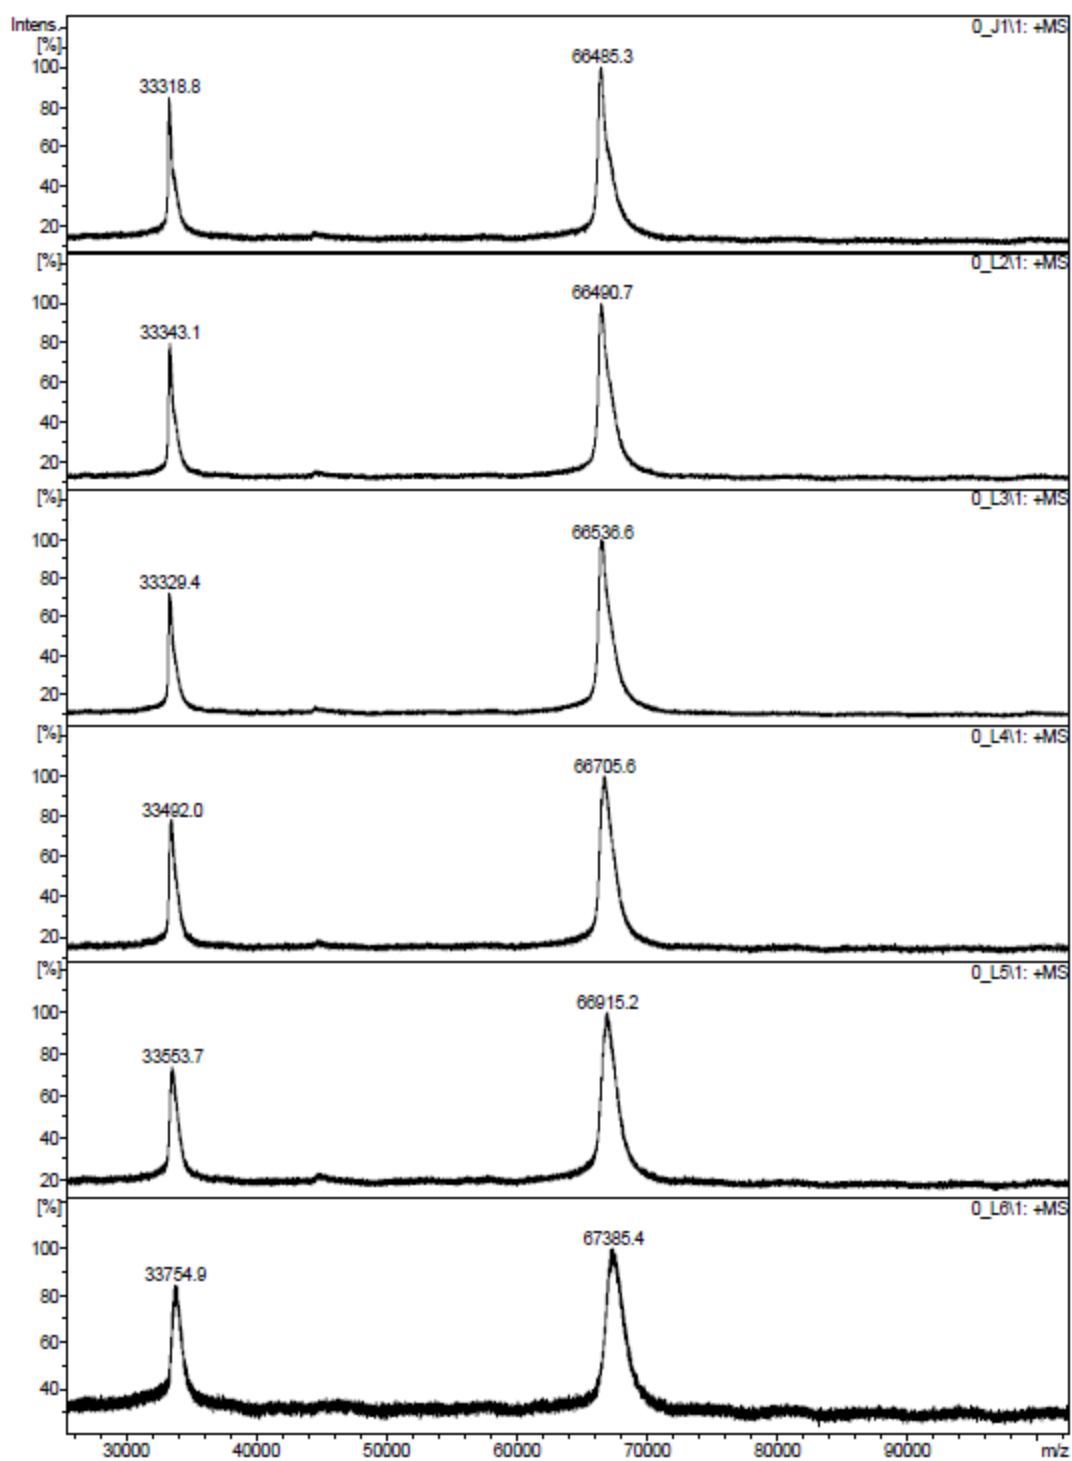

**Figure S6.** Linear positive MALDI mass spectra of nonconvalent binding complexes of BSA and  $[B_{12}H_{12}]^{2-}$ .

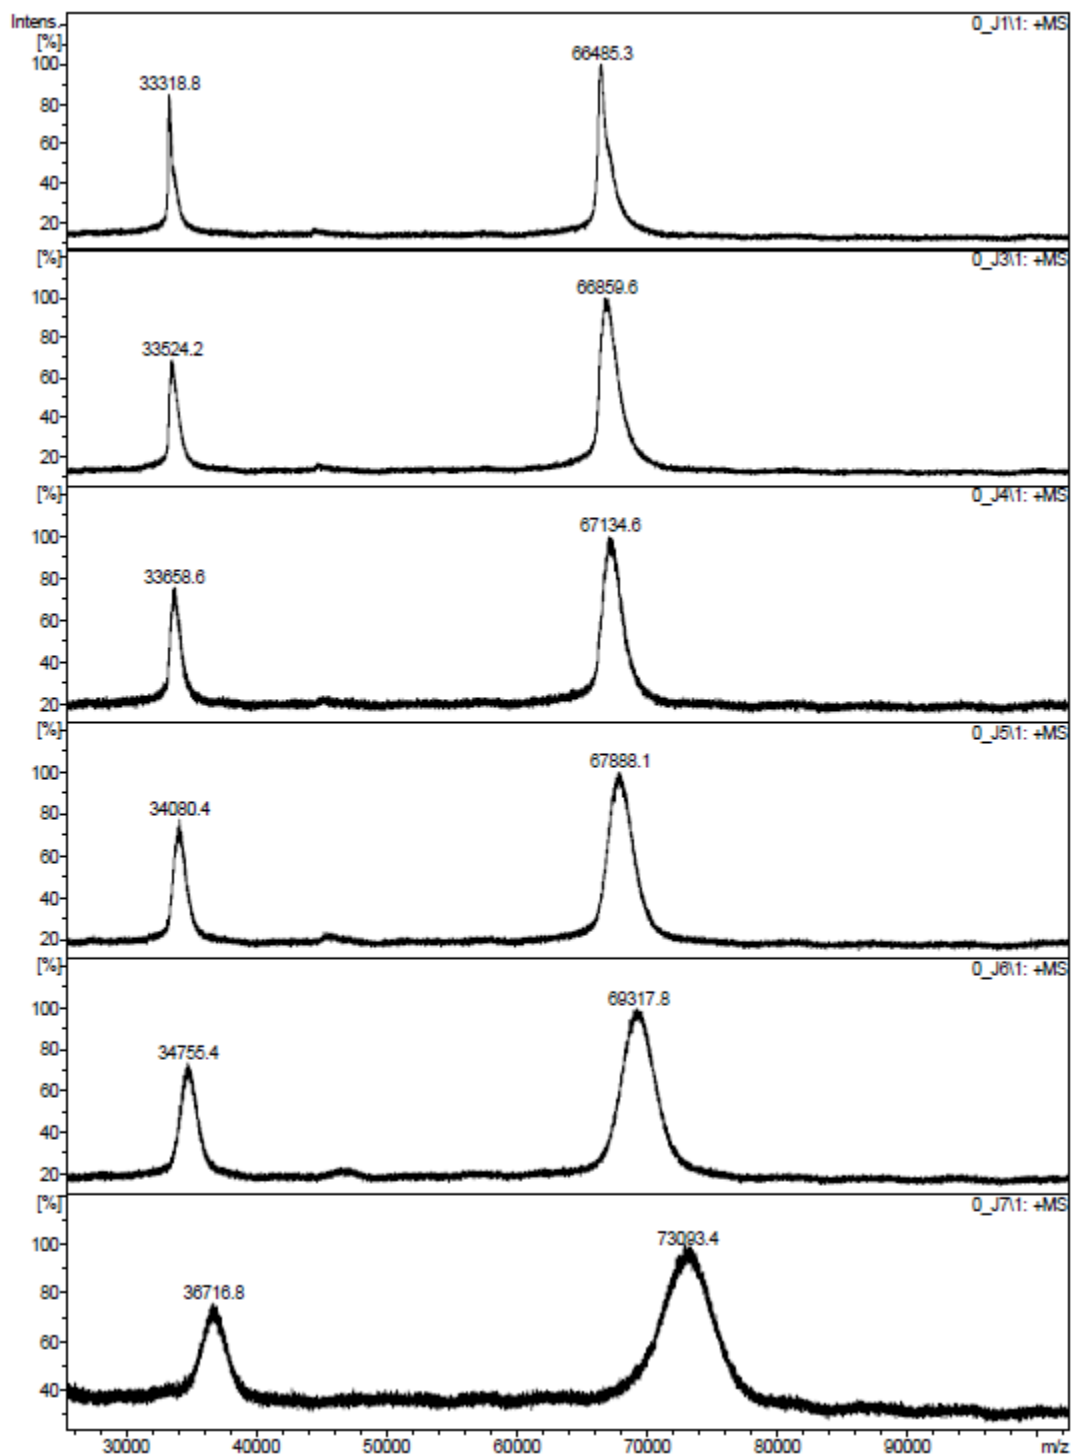

**Figure S7.** Linear positive MALDI mass spectra of noncovalent binding complexes of BSA and [CoD].



**Table S1.** Degree of quenching of: **1** – metallocarborane, **7** – *para*-carborane and **11** – dodecaborate. Fluorescence emission spectra for BSA (10.5  $\mu\text{M}$ ) in the presence of boron clusters in 0.10 M sodium bicarbonate (pH 8.4) with 2% DMSO was recorded from 300 to 500 nm,  $\lambda_{ex}$ =280 nm, at 298 K. The concentration of boron clusters was 10.5  $\mu\text{M}$ . Equation for calculation of degree of quenching parameter, where F and F<sub>0</sub> are the steady-state fluorescence intensities in the presence and absence of quencher.

| Compound  | Degree of quenching [%] | Equation                                                       |
|-----------|-------------------------|----------------------------------------------------------------|
| <b>1</b>  | 60                      | <i>degree of quenching</i> = $(1 - \frac{F}{F_0}) \cdot 100\%$ |
| <b>7</b>  | 6                       |                                                                |
| <b>11</b> | 0                       |                                                                |

**Table S2.** Stern-Volmer constant ( $K_{SV}$ ) and quenching constant ( $k_q$ ) for interaction of boron clusters (**1** to **11**) with BSA at 298, 304 and 310 K. Fluorescence emission spectra of BSA (10.5  $\mu$ M) in the presence of boron clusters (**1** to **11**) in 0.10 M sodium bicarbonate (pH 8.4) with 2% DMSO, at  $\lambda_{ex}$ =280 nm was recorded. The concentration of **1** to **6** was 0 to 10.5  $\mu$ M with 1.05  $\mu$ M intervals; the concentration of **7** to **11** was 0 to 105  $\mu$ M with 17.5  $\mu$ M intervals.

| Compound      | T (K) | $K_{SV}$ ( $M^{-1}$ )         | $k_q$ ( $M^{-1} s^{-1}$ ) | $r^2$  |
|---------------|-------|-------------------------------|---------------------------|--------|
| <b>1</b>      | 298   | $(1.51 \pm 0.07) \times 10^5$ | $2.51 \times 10^{13}$     | 0.9838 |
|               | 304   | $(1.54 \pm 0.07) \times 10^5$ | $2.57 \times 10^{13}$     | 0.9831 |
|               | 310   | $(1.60 \pm 0.07) \times 10^5$ | $2.67 \times 10^{13}$     | 0.9841 |
| <b>2</b>      | 298   | $(1.33 \pm 0.07) \times 10^5$ | $2.22 \times 10^{13}$     | 0.9808 |
|               | 304   | $(1.39 \pm 0.07) \times 10^5$ | $2.31 \times 10^{13}$     | 0.9812 |
|               | 310   | $(1.42 \pm 0.07) \times 10^5$ | $2.37 \times 10^{13}$     | 0.9828 |
| <b>3</b>      | 298   | $(9.19 \pm 0.37) \times 10^4$ | $1.53 \times 10^{13}$     | 0.9874 |
|               | 304   | $(9.30 \pm 0.40) \times 10^4$ | $1.55 \times 10^{13}$     | 0.9856 |
|               | 310   | $(9.34 \pm 0.43) \times 10^4$ | $1.56 \times 10^{13}$     | 0.9836 |
| <b>4</b>      | 298   | $(4.16 \pm 0.10) \times 10^4$ | $6.94 \times 10^{12}$     | 0.9953 |
|               | 304   | $(4.28 \pm 0.12) \times 10^4$ | $7.14 \times 10^{12}$     | 0.9942 |
|               | 310   | $(4.32 \pm 0.10) \times 10^4$ | $7.19 \times 10^{12}$     | 0.9959 |
| <b>5</b>      | 298   | $(1.13 \pm 0.04) \times 10^5$ | $1.88 \times 10^{13}$     | 0.9880 |
|               | 304   | $(1.17 \pm 0.05) \times 10^5$ | $1.94 \times 10^{13}$     | 0.9875 |
|               | 310   | $(1.20 \pm 0.05) \times 10^5$ | $2.00 \times 10^{13}$     | 0.9878 |
| <b>6</b>      | 298   | $(6.48 \pm 0.21) \times 10^4$ | $1.08 \times 10^{13}$     | 0.9915 |
|               | 304   | $(6.62 \pm 0.23) \times 10^4$ | $1.10 \times 10^{13}$     | 0.9906 |
|               | 310   | $(6.79 \pm 0.23) \times 10^4$ | $1.13 \times 10^{13}$     | 0.9911 |
| <b>7 - 11</b> | 298   |                               |                           |        |
|               | 304   | n.d.                          |                           |        |
|               | 310   |                               |                           |        |

**Table S3.** Binding parameters (binding constant –  $K_b$  and binding sites –  $n$ ) and thermodynamic parameters (Gibbs free energy -  $\Delta G^0$ , enthalpy -  $\Delta H^0$  and entropy -  $\Delta S^0$ ) for interaction of boron clusters (**1** to **11**) with BSA at 298, 304 and 310 K. Fluorescence emission spectra of BSA (10.5  $\mu\text{M}$ ) in the presence of boron clusters (**1** to **11**) in 0.10 M sodium bicarbonate (pH 8.4) with 2% DMSO, at  $\lambda_{\text{ex}}=280$  nm was recorded. The concentration of **1** to **6** was 0 to 10.5  $\mu\text{M}$  with 1.05  $\mu\text{M}$  intervals; the concentration of **7** to **11** was 0 to 105  $\mu\text{M}$  with 17.5  $\mu\text{M}$  intervals.

|             | T (K) | $\log K_b$  | $n$         | $r^2$  | $K_b$ ( $\text{M}^{-1}$ ) | $\Delta G_1^0$ <sup>a</sup> (kJ mol <sup>-1</sup> ) | $\Delta G_2^0$ <sup>b</sup> (kJ mol <sup>-1</sup> ) | $\Delta H^0$ (kJ mol <sup>-1</sup> ) | $\Delta S^0$ (J mol <sup>-1</sup> K <sup>-1</sup> ) |
|-------------|-------|-------------|-------------|--------|---------------------------|-----------------------------------------------------|-----------------------------------------------------|--------------------------------------|-----------------------------------------------------|
| <b>1</b>    | 298   | 5.96 ± 0.21 | 1.17 ± 0.04 | 0.9906 | 9.11 × 10 <sup>5</sup>    | -34.0                                               | -34.0                                               | 31.8                                 | 221                                                 |
|             | 304   | 6.05 ± 0.21 | 1.19 ± 0.04 | 0.9910 | 1.13 × 10 <sup>6</sup>    | -35.3                                               | -35.2                                               |                                      |                                                     |
|             | 310   | 6.18 ± 0.21 | 1.21 ± 0.04 | 0.9918 | 1.50 × 10 <sup>6</sup>    | -36.6                                               | -36.6                                               |                                      |                                                     |
| <b>2</b>    | 298   | 5.51 ± 0.25 | 1.09 ± 0.05 | 0.9853 | 3.26 × 10 <sup>5</sup>    | -31.4                                               | -31.4                                               | 36.3                                 | 227                                                 |
|             | 304   | 5.63 ± 0.23 | 1.11 ± 0.04 | 0.9885 | 4.24 × 10 <sup>5</sup>    | -32.8                                               | -32.8                                               |                                      |                                                     |
|             | 310   | 5.76 ± 0.20 | 1.13 ± 0.04 | 0.9910 | 5.75 × 10 <sup>5</sup>    | -34.2                                               | -34.2                                               |                                      |                                                     |
| <b>3</b>    | 298   | 5.41 ± 0.18 | 1.10 ± 0.03 | 0.9927 | 2.56 × 10 <sup>5</sup>    | -30.9                                               | -30.9                                               | 35.2                                 | 222                                                 |
|             | 304   | 5.55 ± 0.18 | 1.12 ± 0.03 | 0.9929 | 3.51 × 10 <sup>5</sup>    | -32.2                                               | -32.3                                               |                                      |                                                     |
|             | 310   | 5.65 ± 0.17 | 1.14 ± 0.03 | 0.9941 | 4.44 × 10 <sup>5</sup>    | -33.5                                               | -33.5                                               |                                      |                                                     |
| <b>4</b>    | 298   | 5.72 ± 0.14 | 1.22 ± 0.03 | 0.9966 | 5.21 × 10 <sup>5</sup>    | -32.6                                               | -32.6                                               | 32.6                                 | 219                                                 |
|             | 304   | 5.85 ± 0.16 | 1.25 ± 0.03 | 0.9955 | 7.00 × 10 <sup>5</sup>    | -34.0                                               | -34.0                                               |                                      |                                                     |
|             | 310   | 5.94 ± 0.15 | 1.26 ± 0.03 | 0.9959 | 8.67 × 10 <sup>5</sup>    | -35.3                                               | -35.2                                               |                                      |                                                     |
| <b>5</b>    | 298   | 5.76 ± 0.20 | 1.15 ± 0.04 | 0.9919 | 5.70 × 10 <sup>5</sup>    | -32.8                                               | -32.8                                               | 30.0                                 | 211                                                 |
|             | 304   | 5.85 ± 0.19 | 1.17 ± 0.04 | 0.9926 | 7.06 × 10 <sup>5</sup>    | -34.1                                               | -34.0                                               |                                      |                                                     |
|             | 310   | 5.96 ± 0.17 | 1.19 ± 0.03 | 0.9945 | 9.11 × 10 <sup>5</sup>    | -35.4                                               | -35.4                                               |                                      |                                                     |
| <b>6</b>    | 298   | 5.21 ± 0.11 | 1.08 ± 0.02 | 0.9970 | 1.61 × 10 <sup>5</sup>    | -29.7                                               | -29.7                                               | 41.1                                 | 238                                                 |
|             | 304   | 5.37 ± 0.13 | 1.12 ± 0.02 | 0.9960 | 2.33 × 10 <sup>5</sup>    | -31.2                                               | -31.2                                               |                                      |                                                     |
|             | 310   | 5.49 ± 0.12 | 1.14 ± 0.02 | 0.9967 | 3.06 × 10 <sup>5</sup>    | -32.6                                               | -32.6                                               |                                      |                                                     |
| <b>7-11</b> | 298   |             |             |        |                           |                                                     |                                                     |                                      |                                                     |
|             | 304   | n.d.        |             |        |                           |                                                     |                                                     |                                      |                                                     |
|             | 310   |             |             |        |                           |                                                     |                                                     |                                      |                                                     |

<sup>a</sup>  $\Delta G_1 = \Delta H - T\Delta S$

<sup>b</sup>  $\Delta G_2 = RT\ln(K_b)$
